# Supplementary figures and images for: A new approach for fabricating germanene with Dirac electrons preserved: a first principles study
Source: Royal Society of Chemistry journal article supplement (doi:10.1039/c5tc03442f), 2016-01-01

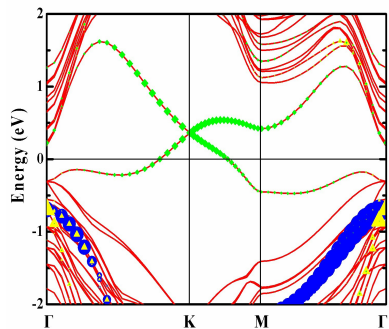

(a)

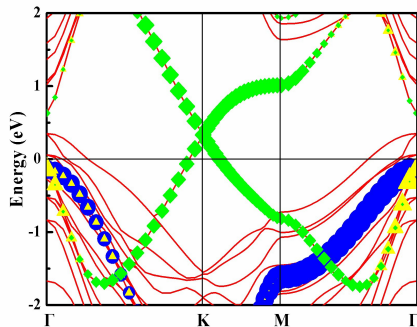

(b)

Supplement: c5tc03442f1.pdf [file c5tc03442f1.pdf]

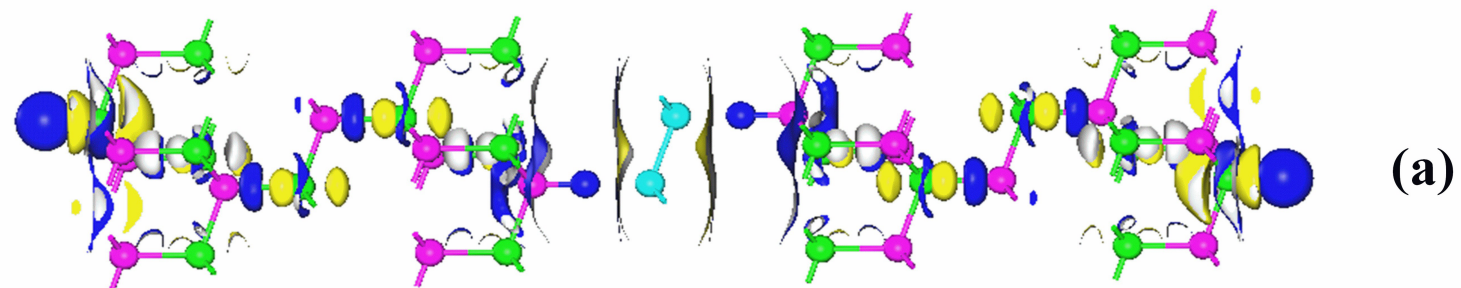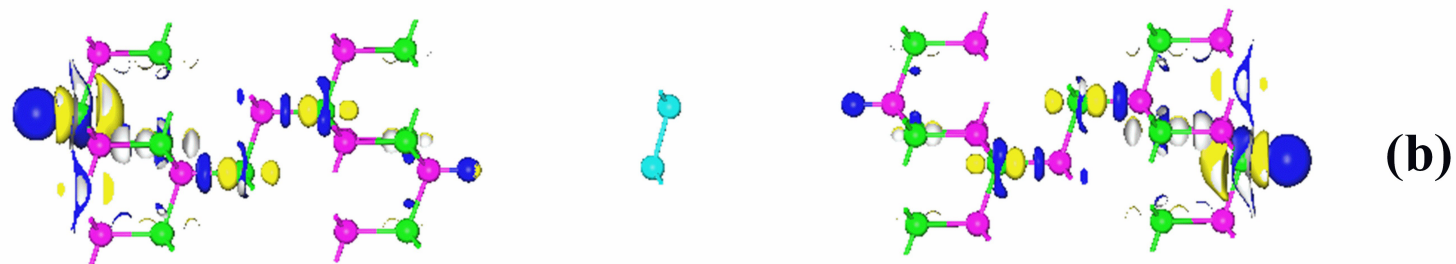

Supplement: c5tc03442f2.pdf [file c5tc03442f2.pdf]
